# Supplementary material for: Enhanced thermoelectric performance of band structure engineered GeSe1−xTex alloys
Source: Royal Society of Chemistry journal article supplement (doi:10.1039/d0se01788d), 2021-01-01
Supplement: d0se01788d1.pdf [file d0se01788d1.pdf]

## Enhancing thermoelectric performance of band structure engineered $\text{GeSe}_{1-x}\text{Te}_x$ alloys

D. Sidharth<sup>1</sup>, A.S. Alagar Nedunchezian<sup>1</sup>, R. Akilan<sup>2</sup>, Anup Srivastava<sup>3</sup>, Bhuvanesh Srinivasan<sup>4</sup>, P. Immanuel<sup>5</sup>, R. Rajkumar<sup>6</sup>, N. Yalini Devi<sup>1</sup>, M. Arivanandhan<sup>1\*</sup>, Chia-Jyi-Liu<sup>5</sup>, G. Anbalagan<sup>6</sup>, R. Shankar<sup>2</sup>, R. Jayavel<sup>1</sup>

<sup>1</sup>Centre for Nanoscience and Technology, Anna University, Chennai-600025, India.

<sup>2</sup>Department of Physics, Bharathiyar University, Coimbatore-641046, India.

<sup>3</sup>Department of Electronics and Communication Engineering, Indian Institute of Information Technology, Allahabad-211012, India.

<sup>4</sup>CNRS-Saint Gobain-NIMS, UMI 3629, Laboratory for Innovative Key Materials and Structures (LINK), National Institute for Materials Science (NIMS), Tsukuba-3050044, Japan.

<sup>5</sup>Department of Physics, National Changhua University of Education, Changhua-500, Taiwan.

<sup>6</sup>Department of Nuclear Physics, University of Madras, Chennai-600025, India.

### Supplementary material

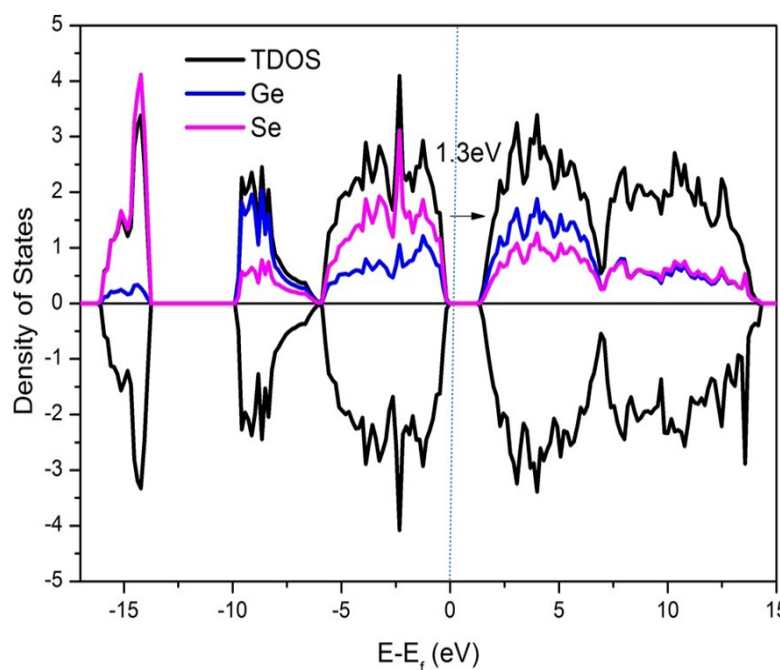

Figure S1 Total and Partial Density of states of GeSe calculated using HSE06 level of theory
